# Supplementary material for: Relationships between nitrogen cycling microbial community abundance and composition reveal the indirect effect of soil pH on oak decline
Source: PubMed Central journal article supplement (PMC8027100; doi:10.1038/s41396-020-00801-0), 2020-10-16

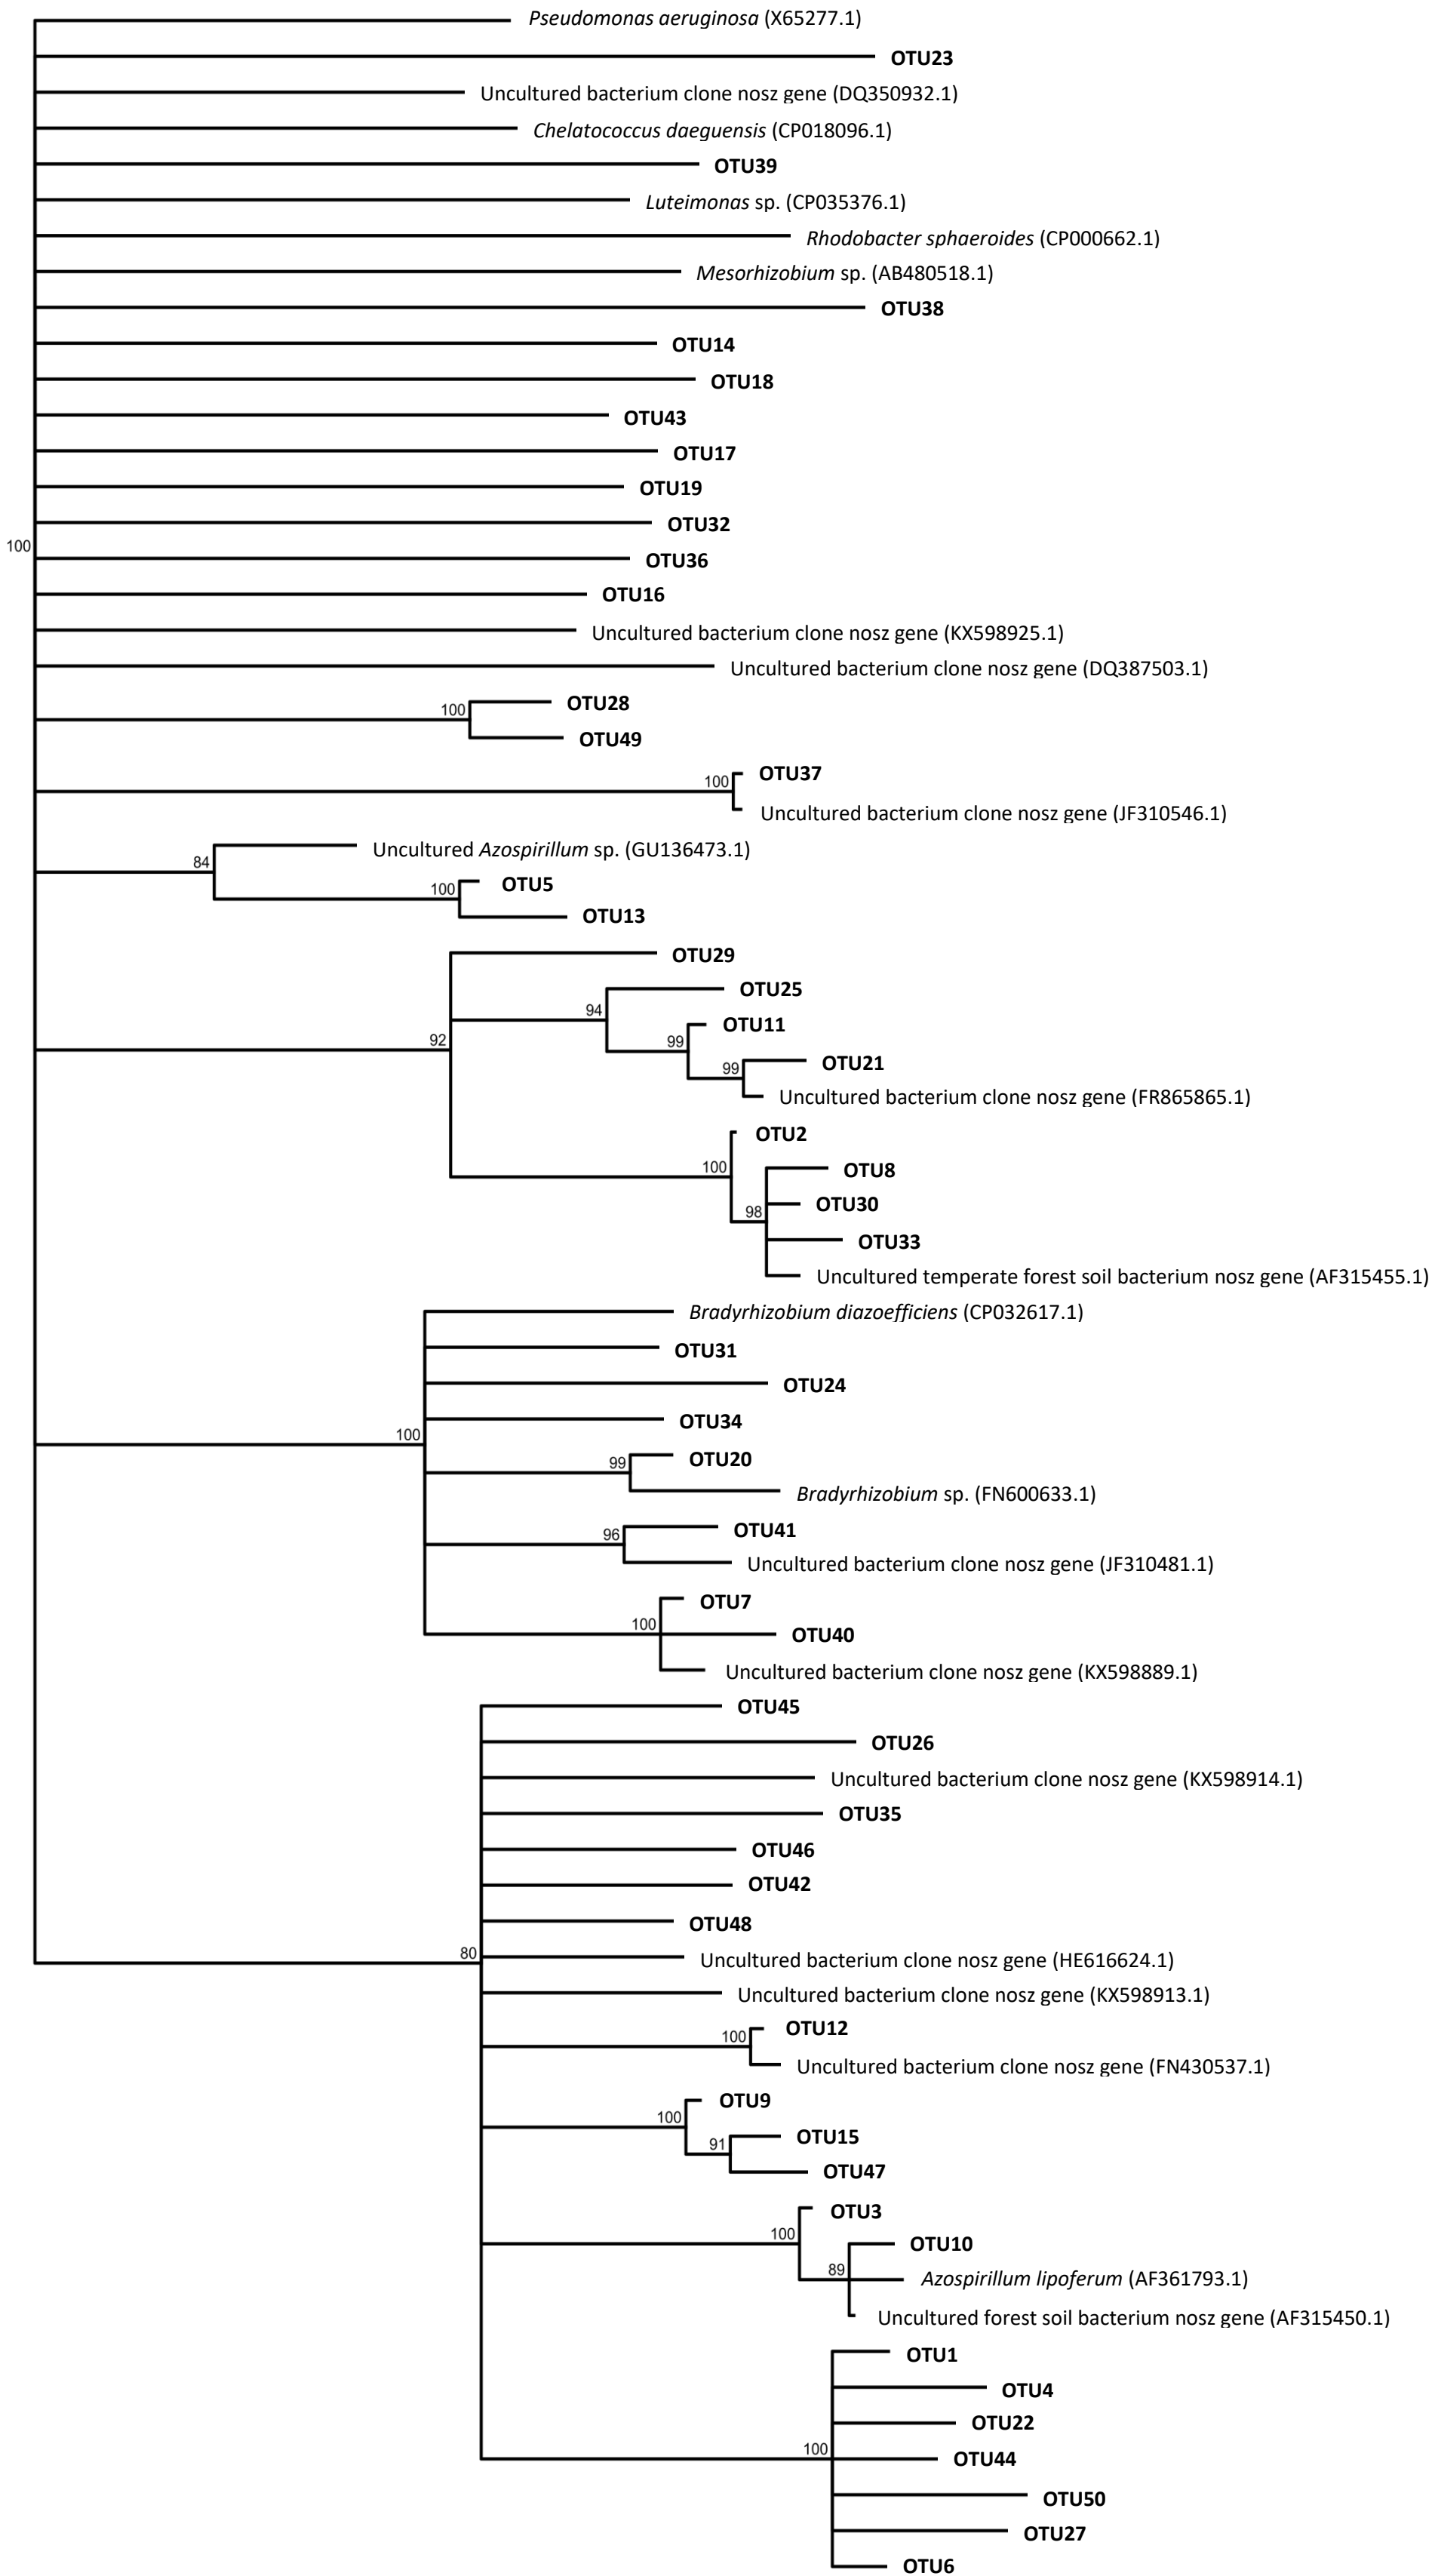

Supplement: 41396_2020_801_MOESM8_ESM.pdf [file 41396_2020_801_MOESM8_ESM.pdf]
